# Supplementary material for: Patients’ perceptions with dabigatran in patients with atrial fibrillation previously treated with vitamin K antagonists
Source: Atypon-hosted journal article supplement (doi:10.2217/cer-2020-0001), 2020-05-29
Supplement: suppl_file.docx [file suppl_file.docx]

**Table S1.** **PACT-Q2 Questionnaire at Baseline.**

| **CONVENIENCE** | **TOTAL** | **Not at all** | **A little bit** | **Moderately** | **A lot** | **A great deal** |
| --- | --- | --- | --- | --- | --- | --- |
| n (%) | n (%) | n (%) | n (%) | n (%) | n (%) |
| B1. In what way do you find it difficult to take your anticoagulant treatment (because they are pills or injections, because of the number you have to take or how often you have to take them, etc.)? | 634 (100.0%) | 214 (33.8%) | 152 (24.0%) | 140 (22.1%) | 98 (15.5%) | 30 (4.7%) |
| B2. To what extent do you find it bothersome to take your anticoagulant treatment? | 633 (100.0%) | 207 (32.7%) | 131 (20.7%) | 138 (21.8%) | 125 (19.7%) | 32 (5.1%) |
| B3. Do you sometimes need to adjust the dose of some anticoagulant treatments? Does this cause you any difficulties? | 633 (100.0%) | 150 (23.7%) | 124 (19.6%) | 144 (22.7%) | 161 (25.4%) | 54 (8.5%) |
| B4. There are certain types of medication that CANNOT BE TAKEN while you are on anticoagulant treatment. Does this cause you any difficulties? | 632 (100.0%) | 140 (22.2%) | 116 (18.4%) | 137 (21.7%) | 175 (27.7%) | 64 (10.1%) |
| B5. You are advised to avoid certain foods while on anticoagulant treatment. Does this cause you any difficulties? | 634 (100.0%) | 140 (22.1%) | 103 (16.2%) | 128 (20.2%) | 176 (27.8%) | 87 (13.7%) |
| B6. To what extent do you find it difficult to take your anticoagulant treatment when you are not at home? | 634 (100.0%) | 193 (30.4%) | 153 (24.1%) | 133 (21.0%) | 124 (19.6%) | 31 (4.9%) |
| B7. To what extent do you find it difficult to organise your time around your anticoagulant treatment (appointments with nurses, doctors, laboratories, etc.)? | 634 (100.0%) | 152 (24.0%) | 144 (22.7%) | 161 (25.4%) | 139 (21.9%) | 38 (6.0%) |
| B8. To what extent do you find the medical follow-up required for your anticoagulant treatment bothersome? | 634 (100.0%) | 139 (21.9%) | 134 (21.1%) | 159 (25.1%) | 160 (25.2%) | 42 (6.6%) |
| B9. To what extent do you find it difficult to take the anticoagulant treatment regularly following your doctor’s instructions? | 634 (100.0%) | 210 (33.1%) | 145 (22.9%) | 153 (24.1%) | 104 (16.4%) | 22 (3.5%) |
| B10. Do you feel that you are more dependent on others (your partner, family, nurse, etc.) due to your anticoagulant treatment? | 633 (100.0%) | 225 (35.5%) | 136 (21.5%) | 122 (19.3%) | 109 (17.2%) | 41 (6.5%) |
| B11. To what extent does having to interrupt or discontinue your anticoagulant treatment worry you? | 633 (100.0%) | 141 (22.3%) | 118 (18.6%) | 124 (19.6%) | 186 (29.4%) | 64 (10.1%) |
| C1. Are your day-to-day activities (work, leisure, social events, physical activities, etc.) limited due to the potential side effects of the treatment (small bruises, bleeding, etc.)? | 633 (100.0%) | 210 (33.2%) | 171 (27.0%) | 128 (20.2%) | 93 (14.7%) | 31 (4.9%) |
| C2. How much physical discomfort do the bruises or pain cause? | 634 (100.0%) | 203 (32.0%) | 183 (28.9%) | 143 (22.6%) | 74 (11.7%) | 31 (4.9%) |

| **SATISFACTION WITH THE ANTICOAGULANT TREATMENT** | n (%) | n (%) | n (%) | n (%) | n (%) | n (%) |
| --- | --- | --- | --- | --- | --- | --- |
|  | **TOTAL** | **Not at all** | **A little bit** | **To some extent/mode-rately** | **A lot** | **Completely** |
| D1. To what extent do you feel more at ease thanks to your anticoagulant treatment? | 632 (100.0%) | 53 (8.4%) | 79 (12.5%) | 225 (35.6%) | 210 (33.2%) | 65 (10.3%) |
| D2. Do you think that the anticoagulant treatment you are taking has been able to reduce your symptoms (pain or swelling in the legs, palpitations, shortness of breath, chest pain, etc.)? | 634 (100.0%) | 268 (42.3%) | 151 (23.8%) | 130 (20.5%) | 72 (11.4%) | 13 (2.1%) |
|  | **TOTAL** | **They are much worse than I expected** | **They are worse than I expected** | **They are about what I expected** | **They are better than I expected** | **They are much better than I expected** |
| D3. How do the side-effects you have, such as small bruises or bleeding (when shaving, cooking, if you cut yourself, etc.) compare to what you expected? | 633 (100.0%) | 36 (5.7%) | 136 (21.5%) | 312 (49.3%) | 110 (17.4%) | 39 (6.2%) |
|  | **TOTAL** | **Very unsatisfactory** | **Unsatis-factory** | **Neither satisfactory nor unsatisfactory** | **Satisfactory** | **Very satisfactory** |
| D4. With regard to the follow-up of your disease and the anticoagulant treatment you are taking, what is your degree of satisfaction with your level of independence? | 634 (100.0%) | 55 (8.7%) | 146 (23.0%) | 233 (36.8%) | 154 (24.3%) | 46 (7.3%) |
| D5. What is your degree of satisfaction with the methods (appointments with nurses, doctors, laboratories, etc.) used to ensure the follow-up of your disease and anticoagulant treatment? | 632 (100.0%) | 33 (5.2%) | 130 (20.6%) | 127 (20.1%) | 239 (37.8%) | 103 (16.3%) |
| D6. What is your degree of satisfaction with the presentation of your anticoagulant treatment (pill to be taken orally/injections)? | 632 (100.0%) | 27 (4.3%) | 93 (14.7%) | 230 (36.4%) | 222 (35.1%) | 60 (9.5%) |
| D7. In general, what is your degree of satisfactions with your anticoagulant treatment? | 632 (100.0%) | 45 (7.1%) | 166 (26.3%) | 205 (32.4%) | 168 (26.6%) | 48 (7.6%) |

**Table S2. PACT-Q2 Questionnaire at Visit 2.**

| **CONVENIENCE** | **TOTAL** | **Not at all** | **A little bit** | **Moderately** | **A lot** | **A great deal** |
| --- | --- | --- | --- | --- | --- | --- |
| n (%) | n (%) | n (%) | n (%) | n (%) | n (%) |
| B1. In what way do you find it difficult to take your anticoagulant treatment (because they are pills or injections, because of the number you have to take or how often you have to take them, etc.)? | 606 (100.0%) | 319 (52.6%) | 165 (27.2%) | 89 (14.7%) | 30 (5.0%) | 3 (0.5%) |
| B2. To what extent do you find it bothersome to take your anticoagulant treatment? | 606 (100.0%) | 303 (50.0%) | 197 (32.5%) | 85 (14.0%) | 20 (3.3%) | 1 (0.2%) |
| B3. Do you sometimes need to adjust the dose of some anticoagulant treatments? Does this cause you any difficulties? | 604 (100.0%) | 331 (54.8%) | 152 (25.2%) | 78 (12.9%) | 41 (6.8%) | 2 (0.3%) |
| B4. There are certain types of medication that CANNOT BE TAKEN while you are on anticoagulant treatment. Does this cause you any difficulties? | 605 (100.0%) | 295 (48.8%) | 145 (24.0%) | 93 (15.4%) | 66 (10.9%) | 6 (1.0%) |
| B5. You are advised to avoid certain foods while on anticoagulant treatment. Does this cause you any difficulties? | 606 (100.0%) | 310 (51.2%) | 144 (23.8%) | 69 (11.4%) | 61 (10.1%) | 22 (3.6%) |
| B6. To what extent do you find it difficult to take your anticoagulant treatment when you are not at home? | 606 (100.0%) | 321 (53.0%) | 193 (31.8%) | 68 (11.2%) | 24 (4.0%) | 0 (0.0%) |
| B7. To what extent do you find it difficult to organise your time around your anticoagulant treatment (appointments with nurses, doctors, laboratories, etc.)? | 604 (100.0%) | 326 (54.0%) | 193 (32.0%) | 63 (10.4%) | 22 (3.6%) | 0 (0.0%) |
| B8. To what extent do you find the medical follow-up required for your anticoagulant treatment bothersome? | 605 (100.0%) | 313 (51.7%) | 209 (34.5%) | 59 (9.8%) | 24 (4.0%) | 0 (0.0%) |
| B9. To what extent do you find it difficult to take the anticoagulant treatment regularly following your doctor’s instructions? | 606 (100.0%) | 350 (57.8%) | 174 (28.7%) | 69 (11.4%) | 12 (2.0%) | 1 (0.2%) |
| B10. Do you feel that you are more dependent on others (your partner, family, nurse, etc.) due to your anticoagulant treatment? | 604 (100.0%) | 359 (59.4%) | 158 (26.2%) | 56 (9.3%) | 27 (4.5%) | 4 (0.7%) |
| B11. To what extent does having to interrupt or discontinue your anticoagulant treatment worry you? | 605 (100.0%) | 196 (32.4%) | 160 (26.4%) | 118 (19.5%) | 107 (17.7%) | 24 (4.0%) |
| C1. Are your day-to-day activities (work, leisure, social events, physical activities, etc.) limited due to the potential side effects of the treatment (small bruises, bleeding, etc.)? | 605 (100.0%) | 294 (48.6%) | 203 (33.6%) | 86 (14.2%) | 20 (3.3%) | 2 (0.3%) |
| C2. How much physical discomfort do the bruises or pain cause? | 605 (100.0%) | 303 (50.1%) | 197 (32.6%) | 82 (13.6%) | 20 (3.3%) | 3 (0.5%) |

| **SATISFACTION WITH THE ANTICOAGULANT TREATMENT** | n (%) | n (%) | n (%) | n (%) | n (%) | n (%) |
| --- | --- | --- | --- | --- | --- | --- |
|  | **TOTAL** | **Not at all** | **A little bit** | **To some extent/moderately** | **A lot** | **Completely** |
| D1. To what extent do you feel more at ease thanks to your anticoagulant treatment? | 605 (100.0%) | 17 (2.8%) | 40 (6.6%) | 114 (18.8%) | 298 (49.3%) | 136 (22.5%) |
| D2. Do you think that the anticoagulant treatment you are taking has been able to reduce your symptoms (pain or swelling in the legs, palpitations, shortness of breath, chest pain, etc.)? | 604 (100.0%) | 170 (28.1%) | 150 (24.8%) | 118 (19.5%) | 130 (21.5%) | 36 (6.0%) |
|  | **TOTAL** | **They are much worse than I expected** | **They are worse than I expected** | **They are about what I expected** | **They are better than I expected** | **They are much better than I expected** |
| D3. How do the side-effects, you have, such as small bruises or bleeding (when shaving, cooking, if you cut yourself, etc.) compare to what you expected? | 604 (100.0%) | 4 (0.7%) | 23 (3.8%) | 247 (40.9%) | 241 (39.9%) | 89 (14.7%) |
|  | **TOTAL** | **Very unsatisfactory** | **Unsatisfac-tory** | **Neither satisfactory nor unsatisfactory** | **Satisfactory** | **Very satisfactory** |
| D4. With regard to the follow-up of your disease and the anticoagulant treatment you are taking, what is your degree of satisfaction with your level of independence? | 605 (100.0%) | 17 (2.8%) | 8 (1.3%) | 81 (13.4%) | 325 (53.7%) | 174 (28.8%) |
| D5. What is your degree of satisfaction with the methods (appointments with nurses, doctors, laboratories, etc.) used to ensure the follow-up of your disease and anticoagulant treatment? | 603 (100.0%) | 21 (3.5%) | 5 (0.8%) | 74 (12.3%) | 321 (53.2%) | 182 (30.2%) |
| D6. What is your degree of satisfaction with the presentation of your anticoagulant treatment (pill to be taken orally/injections)? | 604 (100.0%) | 12 (2.0%) | 6 (1.0%) | 80 (13.2%) | 348 (57.6%) | 158 (26.2%) |
| D7. In general, what is your degree of satisfactions with your anticoagulant treatment? | 604 (100.0%) | 13 (2.2%) | 8 (1.3%) | 37 (6.1%) | 326 (54.0%) | 220 (36.4%) |

**Table S3. PACT-Q2 Questionnaire at Visit 3.**

| **CONVENIENCE** | **TOTAL** | **Not at all** | **A little bit** | **Moderately** | **A lot** | **A great deal** |
| --- | --- | --- | --- | --- | --- | --- |
| n (%) | n (%) | n (%) | n (%) | n (%) | n (%) |
| B1. In what way do you find it difficult to take your anticoagulant treatment (because they are pills or injections, because of the number you have to take or how often you have to take them, etc.)? | 578 (100.0%) | 342 (59.2%) | 180 (31.1%) | 48 (8.3%) | 7 (1.2%) | 1 (0.2%) |
| B2. To what extent do you find it bothersome to take your anticoagulant treatment? | 578 (100.0%) | 337 (58.3%) | 178 (30.8%) | 56 (9.7%) | 7 (1.2%) | 0 (0.0%) |
| B3. Do you sometimes need to adjust the dose of some anticoagulant treatments? Does this cause you any difficulties? | 577 (100.0%) | 355 (61.5%) | 132 (22.9%) | 53 (9.2%) | 33 (5.7%) | 4 (0.7%) |
| B4. There are certain types of medication that CANNOT BE TAKEN while you are on anticoagulant treatment. Does this cause you any difficulties? | 577 (100.0%) | 316 (54.8%) | 137 (23.7%) | 61 (10.6%) | 55 (9.5%) | 8 (1.4%) |
| B5. You are advised to avoid certain foods while on anticoagulant treatment. Does this cause you any difficulties? | 576 (100.0%) | 332 (57.6%) | 124 (21.5%) | 46 (8.0%) | 57 (9.9%) | 17 (3.0%) |
| B6. To what extent do you find it difficult to take your anticoagulant treatment when you are not at home? | 578 (100.0%) | 330 (57.1%) | 199 (34.4%) | 35 (6.1%) | 13 (2.2%) | 1 (0.2%) |
| B7. To what extent do you find it difficult to organise your time around your anticoagulant treatment (appointments with nurses, doctors, laboratories, etc.)? | 578 (100.0%) | 351 (60.7%) | 167 (28.9%) | 48 (8.3%) | 11 (1.9%) | 1 (0.2%) |
| B8. To what extent do you find the medical follow-up required for your anticoagulant treatment bothersome? | 577 (100.0%) | 344 (59.6%) | 164 (28.4%) | 55 (9.5%) | 13 (2.3%) | 1 (0.2%) |
| B9. To what extent do you find it difficult to take the anticoagulant treatment regularly following your doctor’s instructions? | 577 (100.0%) | 370 (64.1%) | 159 (27.6%) | 44 (7.6%) | 3 (0.5%) | 1 (0.2%) |
| B10. Do you feel that you are more dependent on others (your partner, family, nurse, etc.) due to your anticoagulant treatment? | 576 (100.0%) | 372 (64.6%) | 149 (25.9%) | 40 (6.9%) | 9 (1.6%) | 6 (1.0%) |
| B11. To what extent does having to interrupt or discontinue your anticoagulant treatment worry you? | 577 (100.0%) | 208 (36.0%) | 157 (27.2%) | 96 (16.6%) | 82 (14.2%) | 34 (5.9%) |
| C1. Are your day-to-day activities (work, leisure, social events, physical activities, etc.) limited due to the potential side effects of the treatment (small bruises, bleeding, etc.)? | 579 (100.0%) | 307 (53.0%) | 209 (36.1%) | 48 (8.3%) | 12 (2.1%) | 3 (0.5%) |
| C2. How much physical discomfort do the bruises or pain cause? | 579 (100.0%) | 323 (55.8%) | 197 (34.0%) | 47 (8.1%) | 7 (1.2%) | 5 (0.9%) |

| **SATISFACTION WITH THE ANTICOAGULANT TREATMENT** | n (%) | n (%) | n (%) | n (%) | n (%) | n (%) |
| --- | --- | --- | --- | --- | --- | --- |
|  | **TOTAL** | **Not at all** | **A little bit** | **To some extent/moderately** | **A lot** | **Completely** |
| D1. To what extent do you feel more at ease thanks to your anticoagulant treatment? | 577 (100.0%) | 12 (2.1%) | 32 (5.5%) | 79 (13.7%) | 295 (51.1%) | 159 (27.6%) |
| D2. Do you think that the anticoagulant treatment you are taking has been able to reduce your symptoms (pain or swelling in the legs, palpitations, shortness of breath, chest pain, etc.)? | 576 (100.0%) | 144 (25.0%) | 128 (22.2%) | 121 (21.0%) | 131 (22.7%) | 52 (9.0%) |
|  | **TOTAL** | **They are much worse than I expected** | **They are worse than I expected** | **They are about what I expected** | **They are better than I expected** | **They are much better than I expected** |
| D3. How do the side-effects, you have, such as small bruises or bleeding (when shaving, cooking, if you cut yourself, etc.) compare to what you expected? | 575 (100.0%) | 3 (0.5%) | 21 (3.7%) | 195 (33.9%) | 245 (42.6%) | 111 (19.3%) |
|  | **TOTAL** | **Very unsatisfactory** | **Unsatis-factory** | **Neither satisfactory nor unsatisfactory** | **Satisfactory** | **Very satisfactory** |
| D4. With regard to the follow-up of your disease and the anticoagulant treatment you are taking, what is your degree of satisfaction with your level of independence? | 576 (100.0%) | 14 (2.4%) | 10 (1.7%) | 46 (8.0%) | 286 (49.7%) | 220 (38.2%) |
| D5. What is your degree of satisfaction with the methods (appointments with nurses, doctors, laboratories, etc.) used to ensure the follow-up of your disease and anticoagulant treatment? | 573 (100.0%) | 19 (3.3%) | 8 (1.4%) | 44 (7.7%) | 274 (47.8%) | 228 (39.8%) |
| D6. What is your degree of satisfaction with the presentation of your anticoagulant treatment (pill to be taken orally/injections)? | 572 (100.0%) | 10 (1.7%) | 6 (1.0%) | 43 (7.5%) | 300 (52.4%) | 213 (37.2%) |
| D7. In general, what is your degree of satisfactions with your anticoagulant treatment? | 573 (100.0%) | 7 (1.2%) | 7 (1.2%) | 27 (4.7%) | 258 (45.0%) | 274 (47.8%) |
